# Supplementary material for: Use of hydrostatic pressure for modulation of protein chemical modification and enzymatic selectivity
Source: Royal Society of Chemistry journal article supplement (doi:10.1039/c6ob00550k), 2016-01-01
Supplement: c6ob00550k1.pdf [file c6ob00550k1.pdf]

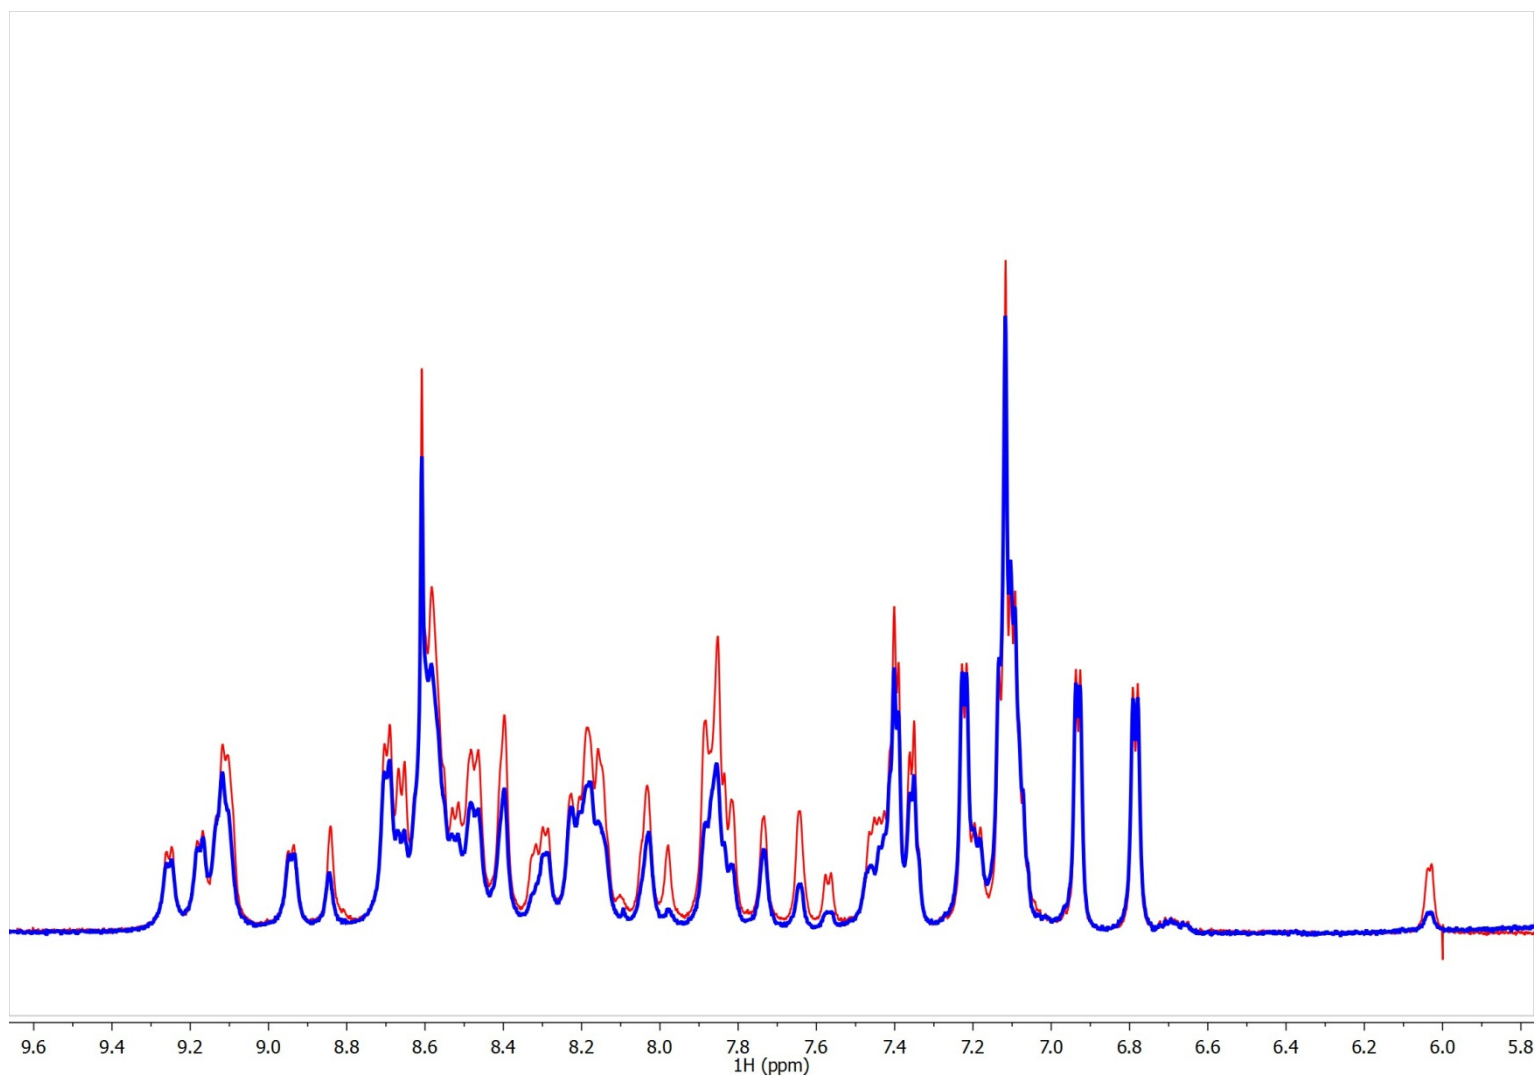

**Figure SI-1.** Overlay of ubiquitin  $^1\text{H}$  NMR spectra in  $\text{D}_2\text{O}$  (backbone amide region). Sample that undergone 3 Kbar pressure for 90 seconds is blue, control sample at atmospheric pressure is red. Peak integration shows that  $\Delta\text{HDX}$  between the two samples is 15.

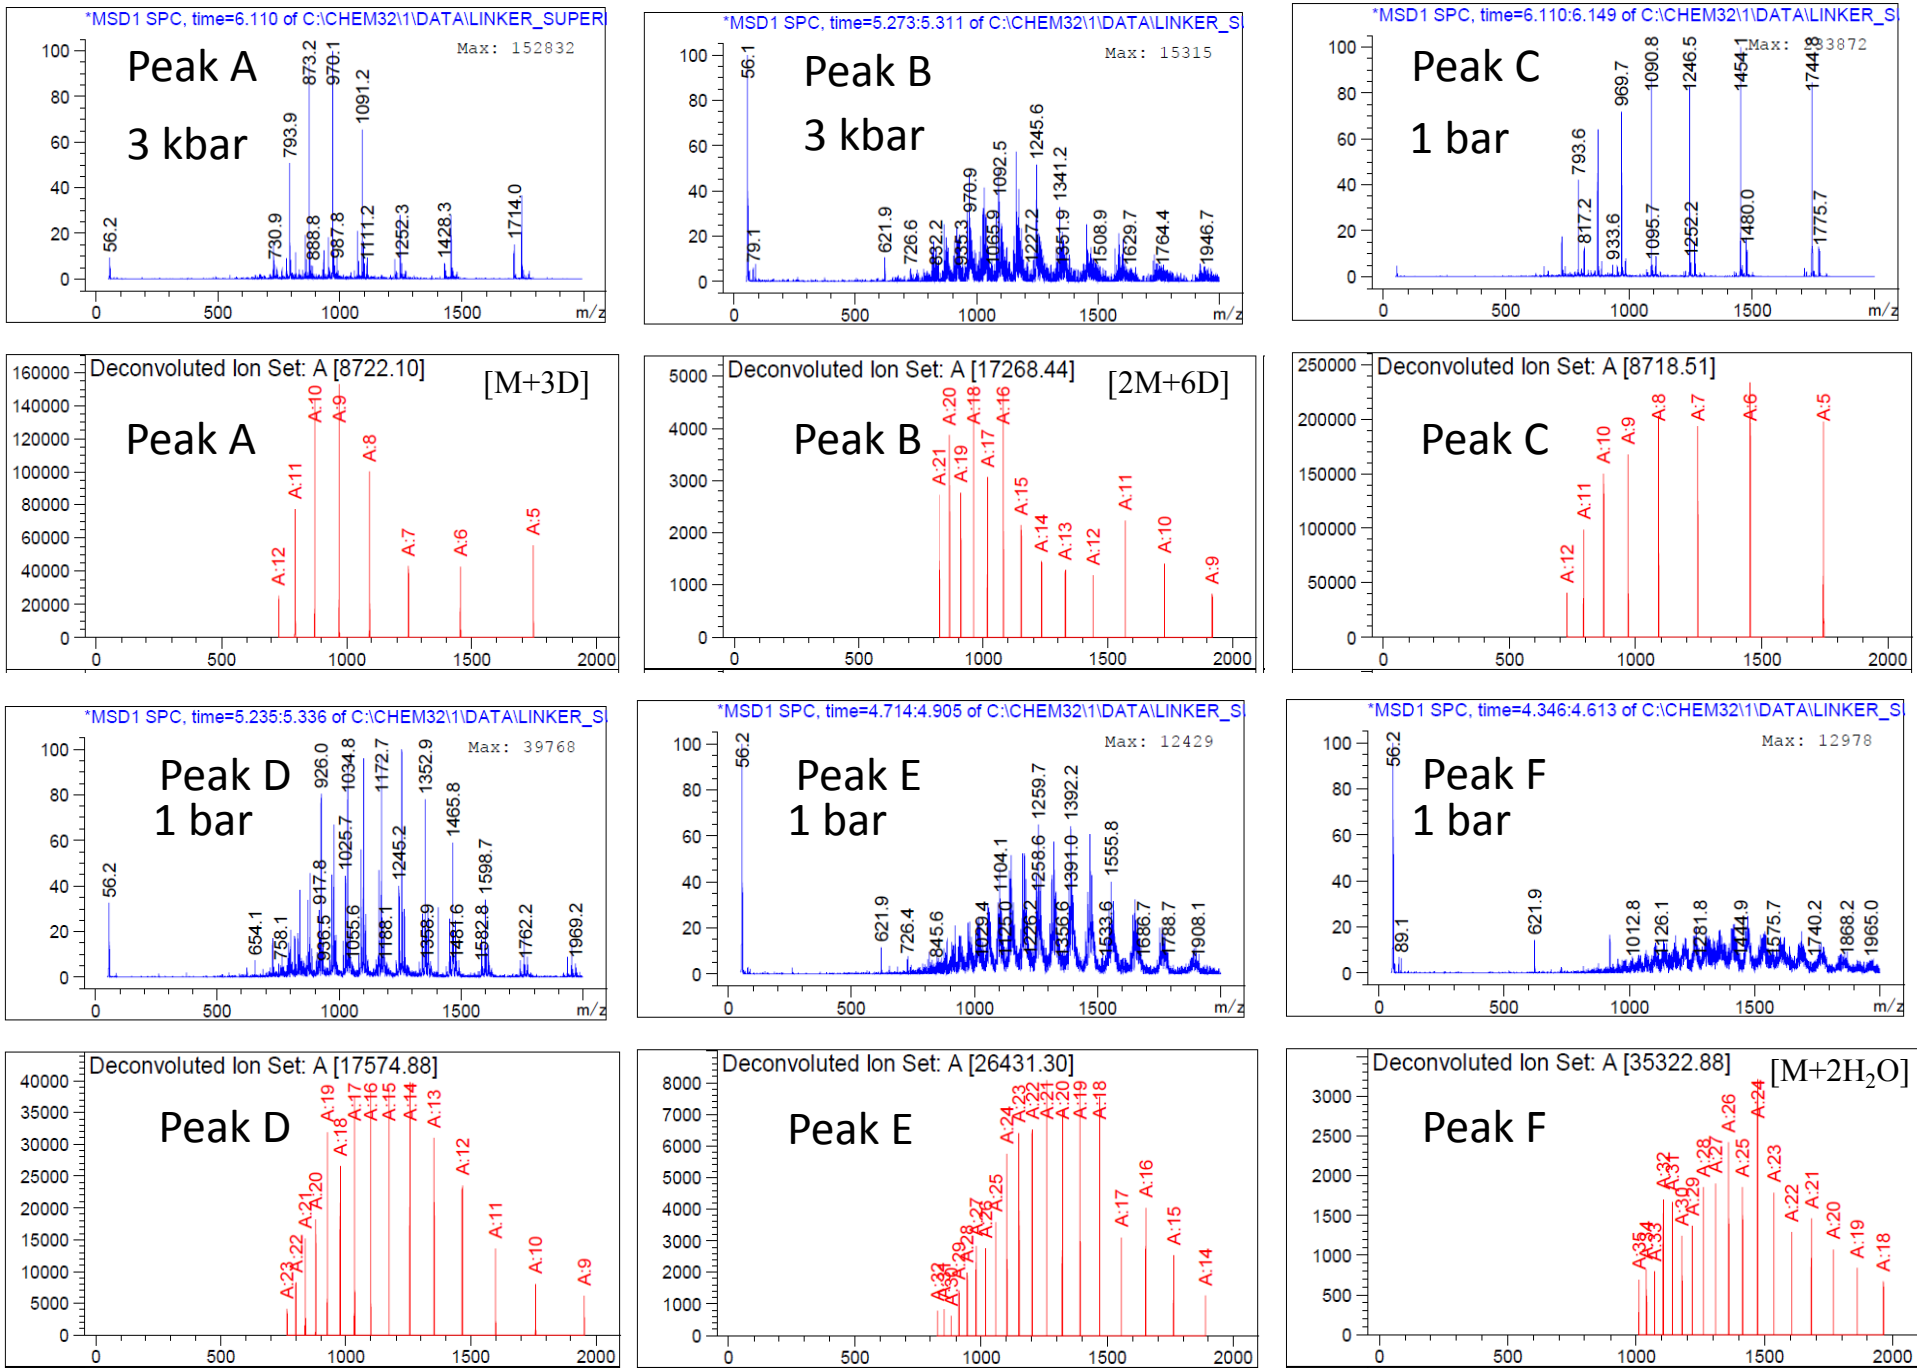

**Figure SI-2.** Examples of mass-spectra and de-convoluted mass-spectra from SEC-MS of ubiquitin reaction with linker (BS<sup>3</sup>) at different pressures (complimentary to Figure 2A)
